# Supplementary material for: Factors controlling material deposition in the CVD of nickel sulfides, selenides or phosphides from dichalcogenoimidodiphosphinato complexes: deposition, spectroscopic and computational studies
Source: Royal Society of Chemistry journal article supplement (doi:10.1039/c002928a), 2010-01-01
Supplement: c002928a.pdf [file c002928a.pdf]

**Factors controlling material deposition in the CVD of nickel sulfides, selenides or phosphides from dichalcogenoimidodiphosphinato complexes: deposition, spectroscopic and computational studies**

Arunkumar Panneerselvam,<sup>a</sup> Ganga Periyasamy,<sup>b</sup> Karthik Ramasamy,<sup>a</sup> Mohammad Afzaal,<sup>a</sup> Mohammad A. Malik,<sup>a</sup> Paul O'Brien,<sup>\*a</sup> Neil A. Burton,<sup>b</sup> John Waters<sup>a</sup> and Bart E. van Dongen<sup>c</sup>

<sup>a</sup> The School of Chemistry and the School of Materials, The University of Manchester, Oxford Road, Manchester, M13 9PL, UK.

E-mail: paul.obrien@manchester.ac.uk

<sup>b</sup> The School of Chemistry, The University of Manchester, Oxford Road, Manchester, M13 9PL, UK.

E-mail: neil.burton@manchester.ac.uk

<sup>c</sup> School of Earth, Atmospheric and Environmental Sciences and Williamson Research Center for Molecular Environmental Science, The University of Manchester, Oxford Road, Manchester, M13 9PL, UK.

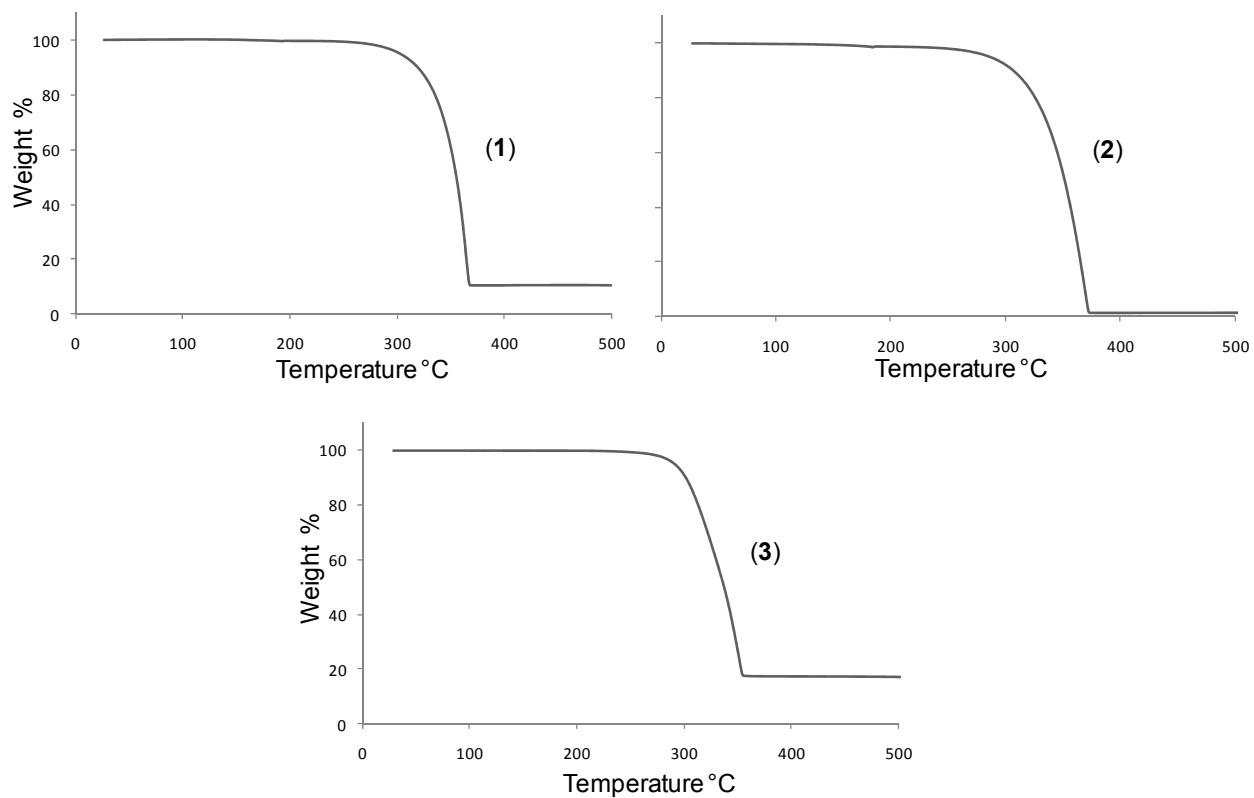

**Fig. S1** TGA plot of precursors  $[\text{Ni}\{\text{Pr}_2\text{P}(\text{S})\text{NP}(\text{Se})\text{Pr}_2\}_2]$  (1),  $[\text{Ni}\{(\text{SP}\text{Pr}_2)_2\text{N}\}_2]$  (2) and  $[\text{Ni}\{(\text{SeP}\text{Pr}_2)_2\text{N}\}_2]$  (3) heated at 10 °C/min under  $\text{N}_2$ .

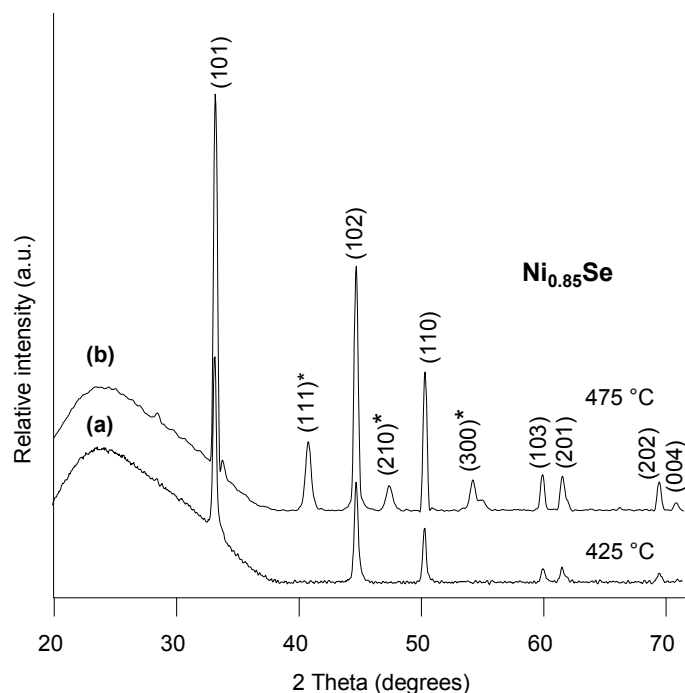

**Fig. S2** XRD patterns of nickel selenide ( $\text{Ni}_{0.85}\text{Se}$ ) films deposited on glass from (1) at flow rate of 240 sccm and deposition temperatures of (a) 425 °C and (b) 475 °C, "\*" -  $\text{Ni}_2\text{P}$  peaks.

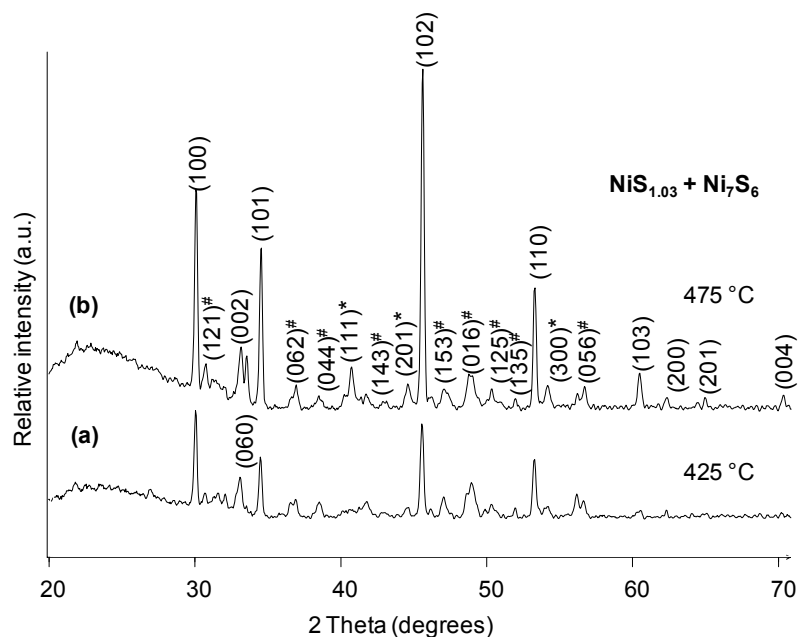

**Fig. S3** XRD patterns of nickel sulfide ( $\text{NiS}_{1.03}$ ) films deposited on glass from (2) at flow rate of 200 sccm and deposition temperatures of (a) 425 °C and (b) 475 °C, "#"-  $\text{Ni}_7\text{S}_6$ , and "\*" -  $\text{Ni}_2\text{P}$  peaks.

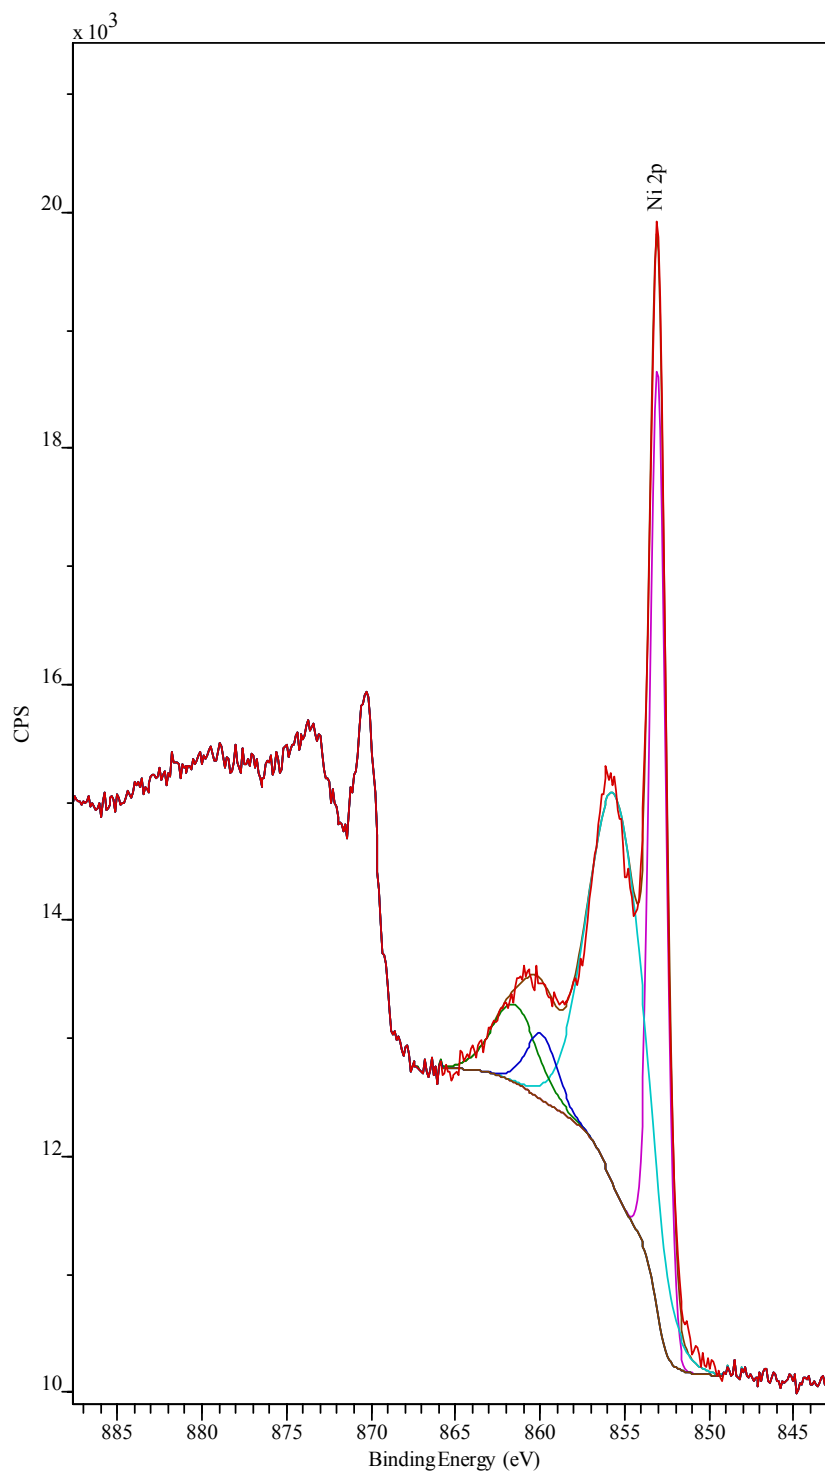

**Fig. S4** XPS spectrum of Ni2p region.

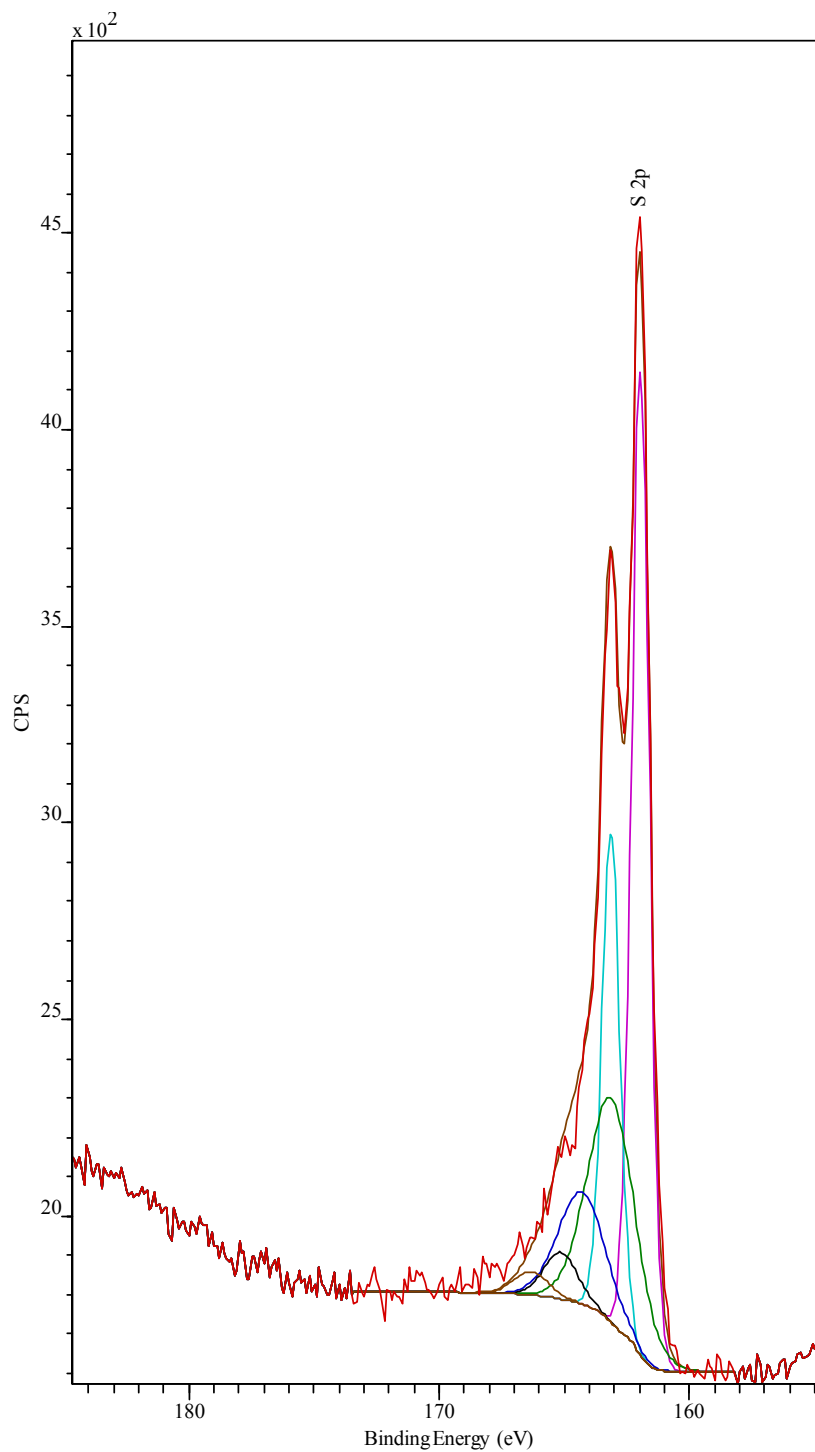

**Fig. S5** XPS spectrum of S2p region.

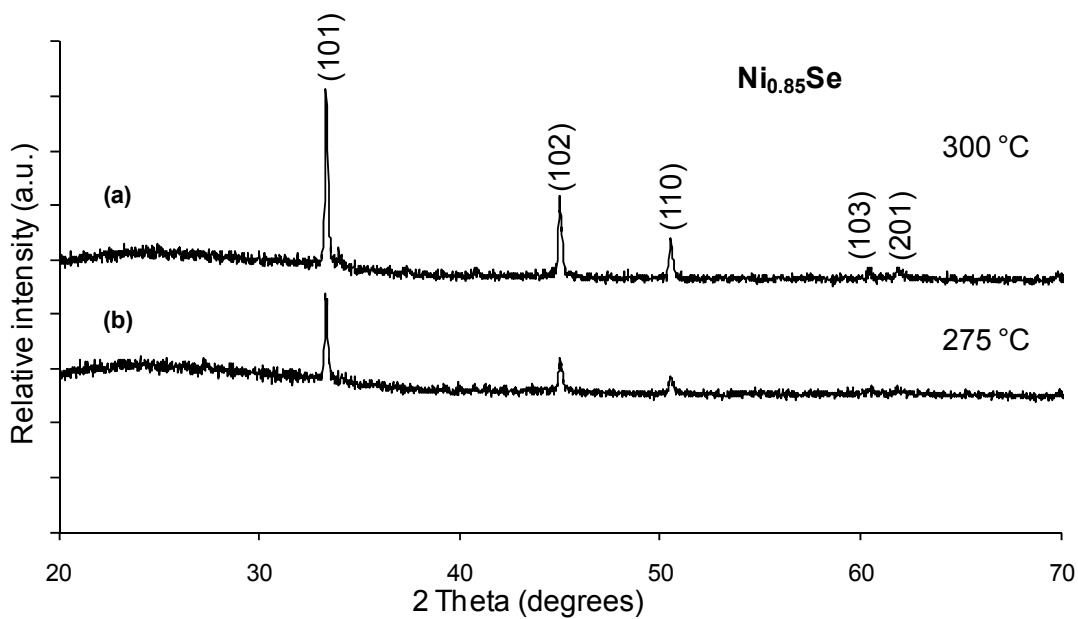

**Fig. S6** XRD patterns of nickel selenide ( $\text{Ni}_{0.85}\text{Se}$ ) films deposited on glass by LPCVD from (3) at substrate temperature of  $425\text{ }^\circ\text{C}$  and  $T_{\text{prec}}$  (a)  $300\text{ }^\circ\text{C}$  and (b)  $275\text{ }^\circ\text{C}$ .

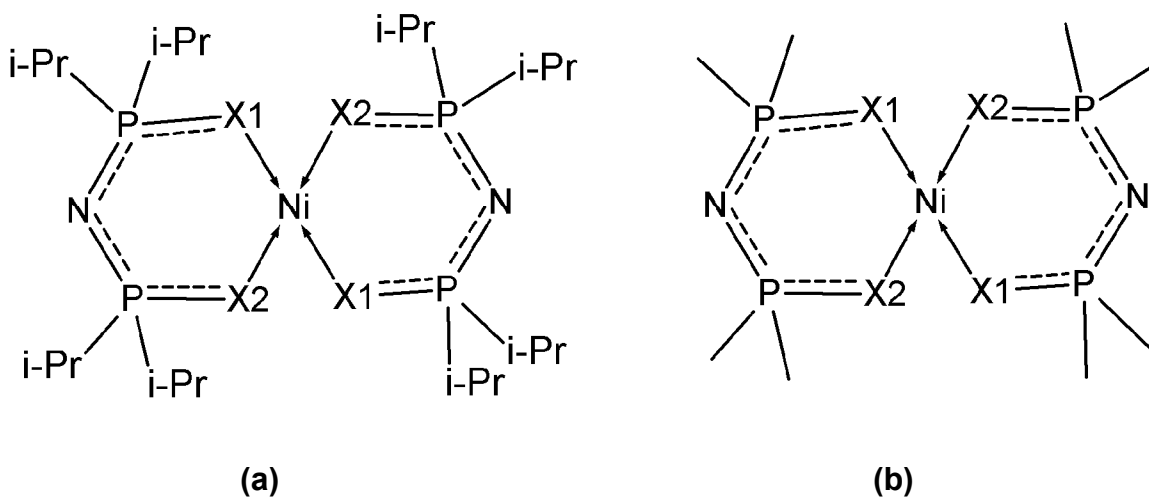

**Fig. S7** (a) Precursor structure  $[\text{Ni}\{\text{i-Pr}_2\text{P}(\text{X1})\text{NP}(\text{X2})\text{i-Pr}_2\}_2]$  [ $\text{X1}=\text{S}$ ,  $\text{X2}=\text{Se}$  (1);  $\text{X1}=\text{X2}=\text{S}$  (2);  $\text{X1}=\text{X2}=\text{Se}$  (3)] and (b) model used in the calculations.

**Table S1.** Reaction energies (kcal mol<sup>-1</sup>) for the precursors (1), (2) and (3) computed at the B3LYP/TZVP/6-31+G(d,p)//B3LYP/6-31+G(d,p) level.

|                                                           | $\Delta_r E$  | $\Delta_r G$  |
|-----------------------------------------------------------|---------------|---------------|
|                                                           | (1)/(2)/(3)   | (1)/(2)/(3)   |
| INTA→INTB                                                 | 70.2/-/75.61  | 61.8/-/59.1/  |
| INTA→INTC                                                 | 60.0/63.8/-   | 50.2/52.1/-   |
| INTB→INTE                                                 | 83.0/275.3/-  | 75.7/267.2/-  |
| INTC→INTD                                                 | 130.1/128.2/- | 120.9/121.3/- |
| INTE→INTF                                                 | -34.5/-/-     | -39.5/-/-     |
| INTE→NiSe <sub>2</sub> +2PNP                              | 59.9          | 48.8          |
| INTF→NiSe <sub>2</sub> +2PNP                              | 94.4          | 88.2          |
| INTF→NiP <sub>2</sub> +2SePN                              | 118.7         | 103.7         |
| NiSe <sub>2</sub> → NiSe + Se                             | 89.1          | 81.2          |
| NiSe → Ni + Se                                            | 101.0         | 94.5          |
| NiSe <sub>2</sub> → NiSe <sup>2+</sup> + Se <sup>2-</sup> | 270.4         | 245.6         |
| NiSe → Ni <sup>2+</sup> + Se <sup>2-</sup>                | 369.9         | 361.9         |
| NiS <sub>2</sub> → NiS + S                                | 99.9          | 94.5          |
| NiS → Ni + S                                              | 111.7         | 104.6         |
| NiS <sub>2</sub> → NiS <sup>2+</sup> + S <sup>2-</sup>    | 250.2         | 236.8         |

**Table S2.** Selected experimental (Exp), computed (DFT) bond-angles (degrees) and ring opening intermediates of precursors (1), (2) and (3)

|          | Precursor                                                                                       | Level            | X1Ni<br>X1 <sup>a</sup> | X2NiX<br>2 <sup>a</sup> | X1Ni<br>X2 <sup>b</sup> | X1PN                    | X2PN | PNP |
|----------|-------------------------------------------------------------------------------------------------|------------------|-------------------------|-------------------------|-------------------------|-------------------------|------|-----|
| <b>1</b> | [Ni{Pr <sub>2</sub> P(S)NP(Se)Pr <sub>2</sub> } <sub>2</sub> ]                                  | Exp <sup>1</sup> | 105                     | 113                     | 109                     | 114                     | 120  | 136 |
|          | [Ni{(CH <sub>3</sub> ) <sub>2</sub> P(S)NP(Se)(CH <sub>3</sub> ) <sub>2</sub> } <sub>2</sub> ]  | DFT              | 109                     | 111                     | 109                     | 117                     | 117  | 125 |
| INTA     | [Ni(SSePNP) <sub>2</sub> ]                                                                      | DFT              | 101                     | 101                     | 113                     | 109                     | 110  | 155 |
| INTB     | [Ni(SCH <sub>3</sub> SePNP) <sub>2</sub> ]                                                      | DFT              | 87                      | 107                     | 107                     | -                       | 111  | 159 |
| INTC     | [Ni(SeCH <sub>3</sub> SPNP) <sub>2</sub> ]                                                      | DFT              | 97                      | 106                     | 109                     | 110                     | -    | 157 |
|          |                                                                                                 |                  |                         |                         |                         |                         |      |     |
| <b>2</b> | [Ni{Pr <sub>2</sub> P(S)NP(S)Pr <sub>2</sub> } <sub>2</sub> ]                                   | Exp <sup>2</sup> | 109                     | -                       | 110                     | 118                     | -    | -   |
|          | [Ni{(CH <sub>3</sub> ) <sub>2</sub> P(S)NP(S)(CH <sub>3</sub> ) <sub>2</sub> } <sub>2</sub> ]   | DFT              | 116                     | -                       | 113                     | 118                     | -    | 128 |
| INTA     | [Ni(SSPNP) <sub>2</sub> ]                                                                       | DFT              | 103                     | -                       | 109                     | 111                     | -    | 152 |
| INTB     | [Ni(SCH <sub>3</sub> SPNP) <sub>2</sub> ]                                                       | DFT              | 108<br>107 <sup>c</sup> | -                       | 107                     | 105<br>110 <sup>c</sup> | -    | 156 |
|          |                                                                                                 |                  |                         |                         |                         |                         |      |     |
| <b>3</b> | [Ni{Pr <sub>2</sub> P(Se)NP(Se)Pr <sub>2</sub> } <sub>2</sub> ]                                 | Exp <sup>3</sup> | -                       | -                       | 110                     | -                       | -    | 138 |
|          | [Ni{(CH <sub>3</sub> ) <sub>2</sub> P(Se)NP(Se)(CH <sub>3</sub> ) <sub>2</sub> } <sub>2</sub> ] | DFT              | -                       | 107                     | 114                     | -                       | 117  | 127 |
| INTA     | [Ni(SeSePNP) <sub>2</sub> ]                                                                     | DFT              | -                       | 106                     | 117                     | -                       | 111  | 159 |
| INTB     | [Ni(SeCH <sub>3</sub> SePNP) <sub>2</sub> ]                                                     | DFT              | 108<br>109 <sup>c</sup> | -                       | 106                     | 106<br>110 <sup>c</sup> | -    | 158 |

'a' indicates the distance and angle between the atom in same ring; where X1, X2 = S or Se; 'b' indicates the angle between the atom in the different ring in the same complex, 'c' indicates the angle due to methylated X1 or X2.

## References

- 1 A. Panneerselvam, M. A. Malik, M. Afzaal, P. O'Brien and M. Helliwell, *J. Am. Chem. Soc.*, 2008, **130**, 2420.
- 2 D. Cupertino, R. Keyte, A. M. Z. Slawin, D. J. Williams and J. D. Woollins, *Inorg. Chem.*, 1996, **35**, 2695.
- 3 A. Panneerselvam, C. Q. Nguyen, J. Waters, M. A. Malik, P. O'Brien, J. Raftery and M. Helliwell, *Dalton Trans.*, 2008, 4499.
